# Supplementary material
Source: publisher figshare collection journal article supplement (https://acs.figshare.com/ndownloader/files/4566028)
Supplement: Supplementary file 1 [file 4566028]

## Active-site motions and polarity enhance catalytic turnover of hydrated subtilisin dissolved in organic solvents

Elton P Hudson<sup>1</sup>, Ross K Eppler<sup>1</sup>, Julianne M Beaudoin<sup>1</sup>, Jonathan S Dordick<sup>2</sup>, Jeffrey A Reimer<sup>1</sup>, Douglas S Clark<sup>1\*</sup>

<sup>1</sup>Department of Chemical Engineering, University of California, Berkeley, California 94720,

<sup>2</sup>Department of Chemical and Biological Engineering, Rensselaer Polytechnic Institute, Troy, New York 12180

### Enzyme Structure in Tetrahydrofuran

Active-site structure was assessed through the steady state  $^1\text{H}$ - $^{19}\text{F}$  Nuclear Overhauser Effect (NOE) enhancement factor. The NOE in THF was -0.73 at  $a_w=0$ , indicative of a folded but not tightly packed active-site, and increased sharply at between  $a_w = 0.1$ -0.3 (Figure S1A). This evinces a loss of proton contact around the fluorine nucleus and is typical of an unstructured environment.<sup>1</sup> Interestingly, at the hydration level where the enzyme exhibited maximum catalytic activity,  $a_w=0.2$ , an NOE of -0.6 was recorded, suggesting that the active-site was at least partially unfolded. The NOE in isooctane at  $a_w=0$  was -0.82, close to the aqueous enzyme NOE of -0.85, and did not change at full hydration.

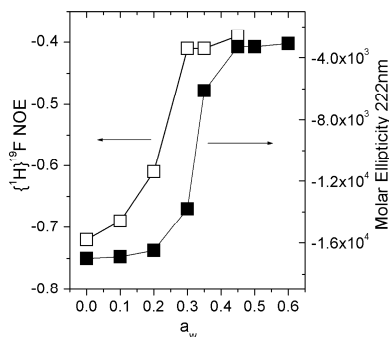

**Figure S1.** Global and active-site stability of 4FBS-subtilisin in tetrahydrofuran. (A)  $^1\text{H}$ - $^{19}\text{F}$  NOE (□) and molar ellipticity (■) were calculated as described in *Experimental*.

### Empirical Relation Between $^{19}\text{F}$ Chemical Shift and Solvent Dielectric Constant

Values for the chemical shift were taken at infinite dilution for acetone, isooctane, and 1-propanol.

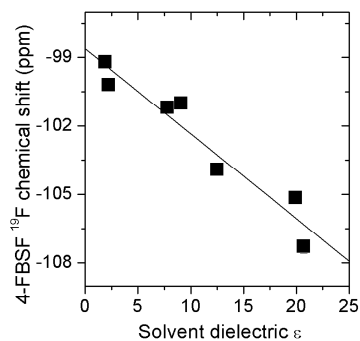

**Figure S2.** Calibration of  $^{19}\text{F}$  chemical shift with solvent dielectric constant. The aromatic  $^{19}\text{F}$  resonance of 4FBSF (10-500  $\mu\text{M}$ ) is referenced to  $\text{CFCl}_3$  at 376MHz. Solvents used were 1-PrOH ( $\epsilon=20.1$ ), acetone (20.6), THF (7.8), methylene chloride (8.9), t-butanol (12.5), hexane (1.9), isooctane (2.0)

## References

- (1) Kairi, M.; Gerig, J. T. *Mag Res Chem* **1990**, 28, 47-55.
